# Supplementary material for: Molecular and Entomological Characterization of 2023 Dengue Outbreak in Dhading District, Central Nepal
Source: MDPI journal article supplement (doi:10.3390/v16040594), 2024-04-12
Supplement: s1 [file s1]

## Supplementary Tables

**Supplementary Table S1.** Primer used for conventional RT-PCR

| Assay                  | Identification          | Sequences (5' - 3')               | Size<br>(base pair) |
|------------------------|-------------------------|-----------------------------------|---------------------|
| Conventional<br>RT-PCR | Dengue Consensus primer |                                   |                     |
|                        | DC-1, Forward           | TCAATATGCTGAAACGCGCG<br>AGAAACCG  | 511                 |
|                        | DC-2, Reverse           | TTGCACCAACAGTCAATGTCT<br>TCAGGTTC |                     |
|                        | Dengue serotype primer  |                                   |                     |
|                        | D1-Forward              | GGACTGCGTATGGAGTTTTG              | 490                 |
|                        | D1-Reverse              | ATGGGTTGTGGCCTAATCAT              |                     |
|                        | D2-Forward              | G TTCCTCTGCAAACACTCCA             | 230                 |
|                        | D2-Reverse              | GTGTTATTTTGATTCCTTG               |                     |
|                        | D3-Forward              | GTGCTTACACAGCCCTATTT              | 320                 |
|                        | D3-Reverse              | CCATTCTCCCAAGCGCCTG               |                     |
|                        | D4-Forward              | CCATTATGGCTGTGTTGTTT              | 399                 |
|                        | D4-Reverse              | CTTCATCCTGCTTCACTTCT              |                     |

**Supplementary Table S2.** Demographic and clinical parameters of dengue patients and OFI patients

| <b>Characteristics</b>     | <b>Category</b> | <b>Dengue patients</b> | <b>OFI patients</b> | <b>P-value</b>   |
|----------------------------|-----------------|------------------------|---------------------|------------------|
| <b>Age</b>                 | Child           | 48 (39.3)              | 74 (60.6)           | <b>0.046</b>     |
|                            | Adult           | 230 (83.9)             | 44 (16.1)           |                  |
| <b>Gender</b>              | Female          | 153 (68.3)             | 71 (31.7)           | 0.145            |
|                            | Male            | 129 (75.0)             | 43 (25.0)           |                  |
| <b>Travel history</b>      | No              | 80 (79.2)              | 21 (20.8)           | 0.684            |
|                            | Yes             | 8 (88.9)               | 1 (11.1)            |                  |
| <b>Myalgia</b>             | No              | 26 (83.9)              | 5 (16.1)            | 0.525            |
|                            | Yes             | 62 (78.5)              | 17 (21.5)           |                  |
| <b>Rash</b>                | No              | 59 (72.8)              | 22 (27.2)           | <b>0.001</b>     |
|                            | Yes             | 29 (100.0)             | 0 (0.0)             |                  |
| <b>Diarrhea</b>            | No              | 78(78.8)               | 21 (21.2)           | 0.690            |
|                            | Yes             | 10 (90.9)              | 1 (9.1)             |                  |
| <b>Vomiting</b>            | No              | 59 (74.7)              | 20 (25.3)           | <b>0.033</b>     |
|                            | Yes             | 29 (93.5)              | 2 (6.5)             |                  |
| <b>Persistent Vomiting</b> | No              | 71 (76.3)              | 22 (23.7)           | <b>0.022</b>     |
|                            | Yes             | 17 (100.0)             | 0 (0.0)             |                  |
| <b>Retro-orbital pain</b>  | No              | 36 (65.5)              | 19 (34.5)           | <b>&lt;0.001</b> |
|                            | Yes             | 52 (94.5)              | 3 (4.5)             |                  |
| <b>Any bleeding</b>        | No              | 88 (88.0)              | 22 (20.0)           | -                |
| <b>Anorexia</b>            | No              | 32 (78.0)              | 9 (22.0)            | 0.693            |
|                            | Yes             | 56 (81.2)              | 13 (18.8)           |                  |
| <b>Nausia</b>              | No              | 42 (71.2)              | 17 (28.2)           | <b>0.013</b>     |
|                            | Yes             | 46 (90.2)              | 5 (9.8)             |                  |
| <b>Abdominal pain</b>      | No              | 76 (77.6)              | 22 (22.4)           | 0.120            |
|                            | Yes             | 12 (100.0)             | 0 (0.0)             |                  |
| <b>Admission status</b>    | No              | 238 (67.6)             | 114 (32.4)          | <b>&lt;0.001</b> |
|                            | Yes             | 44 (100.0)             | 0 (0.0)             |                  |

**Supplementary Table S3.** Laboratory parameters of dengue patients and OFI patients

| Blood parameters  | Dengue patients Median (IQR) | OFI patients Median (IQR) | P-value          |
|-------------------|------------------------------|---------------------------|------------------|
| Hemoglobin        | 12.8 (11.7-14.3)             | 12.7 (12.0-13.6)          | 0.420            |
| Total count (WBC) | 5250 (3628-6630)             | 6675 (5167-8732)          | <b>&lt;0.001</b> |
| Neutrophils       | 68 (56.7-75.0)               | 62.5 (50.0-71.3)          | <b>0.020</b>     |
| Lymphocytes       | 21.0 (16.0-31.0)             | 27.0 (18.8-41.0)          | <b>0.010</b>     |
| Eosinophils       | 1.0 (1.0-3.0)                | 2.0 (1.0-3.0)             | 0.319            |
| Monocytes         | 8.0 (5.0-11.0)               | 7.0 (5.0-10.0)            | 0.323            |
| Platelets         | 171.6 (120.0-233.0)          | 207.0 (150.5-264.0)       | <b>&lt;0.001</b> |
| HCT               | 40.5 (36.5-44.3)             | 39.0 (37.0-42.0)          | 0.256            |
| Serum urea        | 41.0 (32.3-50.6)             | 43.0 (34.5-55.0)          | 0.371            |
| Creatinine        | 1.0 (0.9-1.1)                | 0.9 (0.8-1.1)             | 0.346            |
| Sodium            | 136.0 (134.0-138.0)          | 136.5 (134.0-138.6)       | 0.791            |
| Potassium         | 3.8 (3.5-4.0)                | 3.8 (3.5-4.2)             | 0.357            |
| SGPT              | 42.0 (24.0-64.0)             | 34.0 (25.0-94.0)          | 0.422            |
| SGOT              | 41.0 (30.0-78.0)             | 39.0 (26.0-58.0)          | 0.564            |
| ALP               | 241.0 (185.0-319.0)          | 268.0 (200.0-417.0)       | 0.429            |
| Bilirubin-Total   | 0.6 (0.6-0.8)                | 0.7 (0.6-0.8)             | 0.435            |
| Bilirubin-Direct  | 0.15 (0.1-0.2)               | 0.2 (0.1-0.2)             | 0.294            |
